# Supplementary material for: Identification and Characterization of Common Bean (Phaseolus vulgaris) Non-Nodulating Mutants Altered in Rhizobial Infection
Source: MDPI journal article supplement (doi:10.3390/plants12061310), 2023-03-14
Supplement: s1 [file s1]

**Table S1.** Segregation ratio of wt nodulation (wt) vs. mutant non-nodulation (*nnod*) (wt : *nnod*) phenotype in M5 plants derived from selected mutant lines

| Mutant line ID   | Number of M5 plants<br>analyzed | Number of M5 plants<br>derived from M4 | wt : <i>nnod</i> | Number of M5 plants<br>analyzed | Number of M5 plants<br>derived from M4 | wt : <i>nnod</i> |
|------------------|---------------------------------|----------------------------------------|------------------|---------------------------------|----------------------------------------|------------------|
| 08IS-0647        | 12                              |                                        | 6 : 1            | 10                              |                                        | 6 : 1            |
| 08IS-0656        | 12                              |                                        | 6 : 1            | 10                              |                                        | 6 : 1            |
| 08IS-0771        | 12                              |                                        | 2 : 1            | 10                              |                                        | 2 : 1            |
| 08IS-0960        | 11                              |                                        | 5 : 1            | 10                              |                                        | 2 : 1            |
| 08IS-1001        | 9                               |                                        | 7 : 1            | 10                              |                                        | 5 : 1            |
| 08IS-1020        | 12                              |                                        | 6 : 1            | 12                              |                                        | 6 : 1            |
| 08IS-1022        | 12                              |                                        | 4 : 1            | 10                              |                                        | 2 : 1            |
| 08IS-1406        | 9                               |                                        | 5 : 1            | 9                               |                                        | 4 : 1            |
| <b>08IS-1895</b> | <b>12</b>                       |                                        | <b>2 : 1</b>     | <b>11</b>                       |                                        | <b>3 : 1</b>     |
| 08IS-1927        | 12                              |                                        | 6 : 1            | 12                              |                                        | wt               |
| <b>08IS-2114</b> | <b>12</b>                       |                                        | <b>4 : 1</b>     | <b>11</b>                       |                                        | <b>2 : 1</b>     |
| <b>08IS-2353</b> | <b>11</b>                       |                                        | <b>4 : 1</b>     | <b>11</b>                       |                                        | <b>3 : 1</b>     |
| 08IS-2401        | 12                              |                                        | 4 : 1            | 12                              |                                        | wt               |

The mutants that were characterized for this work are written in bold. The mutant lines: 08IS-0508, 08IS-0557, 08IS-0582, 08IS-0586, 08IS-0594, 08IS-0602, 08IS-0604, 08IS-0607, 08IS-0615, 08IS-0624, 08IS-0625, 08IS-0661, 08IS-0664, 08IS-0665, 08IS-1021, 08IS-1038, 08IS-1828, 08IS-1959, 08IS-2111, 08IS-2212, 08IS-2360, 08IS-2375 and 08IS-2398 were also screened but these showed a wt phenotype in every plant.
